# Supplementary material for: Rational Construction of a Responsive Azo-Functionalized Porous Organic Framework for CO2 Sorption
Source: MDPI journal article supplement (doi:10.3390/molecules26164993), 2021-08-18
Supplement: s1 [file s1]

## Supporting Information

### Rational Construction of a Responsive Azo-Functionalized Porous Organic Framework for CO<sub>2</sub> Sorption

Rongrong Yuan <sup>1</sup>, Hao Sun <sup>1</sup> and Hongming He <sup>2,\*</sup>

<sup>1</sup> Department of Materials Science and Engineering, Jilin Jianzhu University, Changchun 130118, P. R. China

<sup>2</sup> College of Chemistry, Tianjin Key Laboratory of Structure and Performance for Functional Molecules, Tianjin Normal University, Tianjin 300387, P. R. China

**Figure S1.** Changes in the adsorption spectra of azobenzene in CH<sub>2</sub>Cl<sub>2</sub> over the time during the irradiation with 365 nm light

**Figure S2.** BET surface area plots

**Table S1.** The BET surface area report of JJU-1

**Figure S3.** The plots of pressures in function of gas uptakes and the parameters (Virial-type expression) for the calculation of heats of adsorption of CO<sub>2</sub> for (a) initial JJU-1 and (b) JJU-1-1st UV

**Figure S4.** The reversible CO<sub>2</sub> adsorption isotherms at 273 K by UV irradiation and thermal treatment of JJU-1

**Figure S5.** The schematic diagram of the structure changes during the reversible *trans/cis* transformation of azo functional group under UV irradiation and thermal regeneration

**Table S2.** BET surface area reports and CO<sub>2</sub> uptakes of some similar POFs

**References**

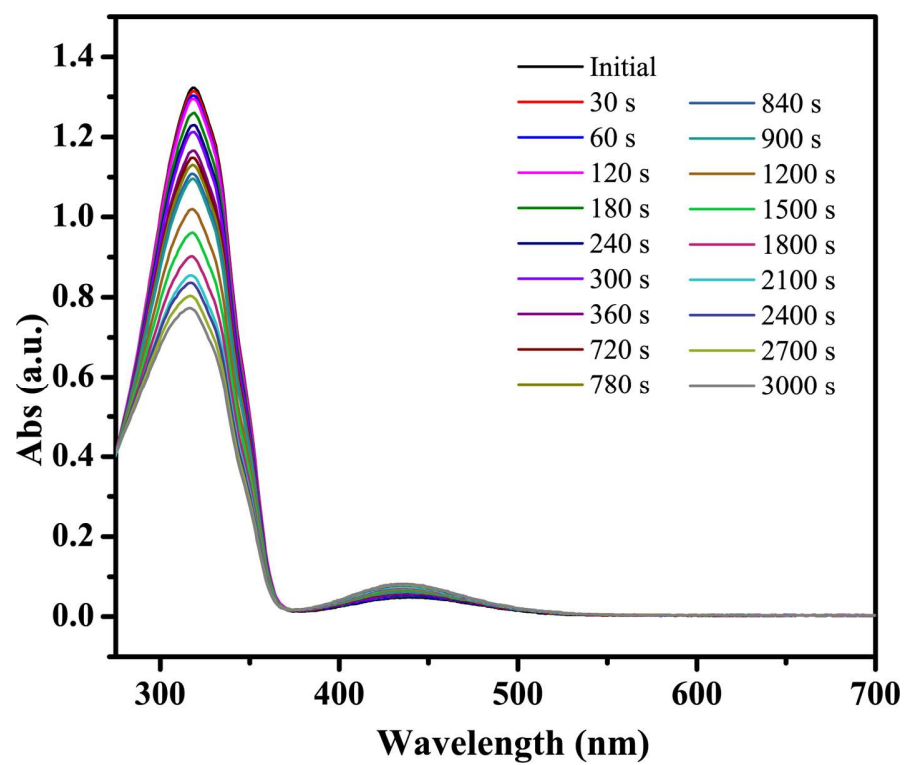

**Figure S1.** Changes in the adsorption spectra of azobenzene in  $\text{CH}_2\text{Cl}_2$  over the time during the irradiation with 365 nm light.

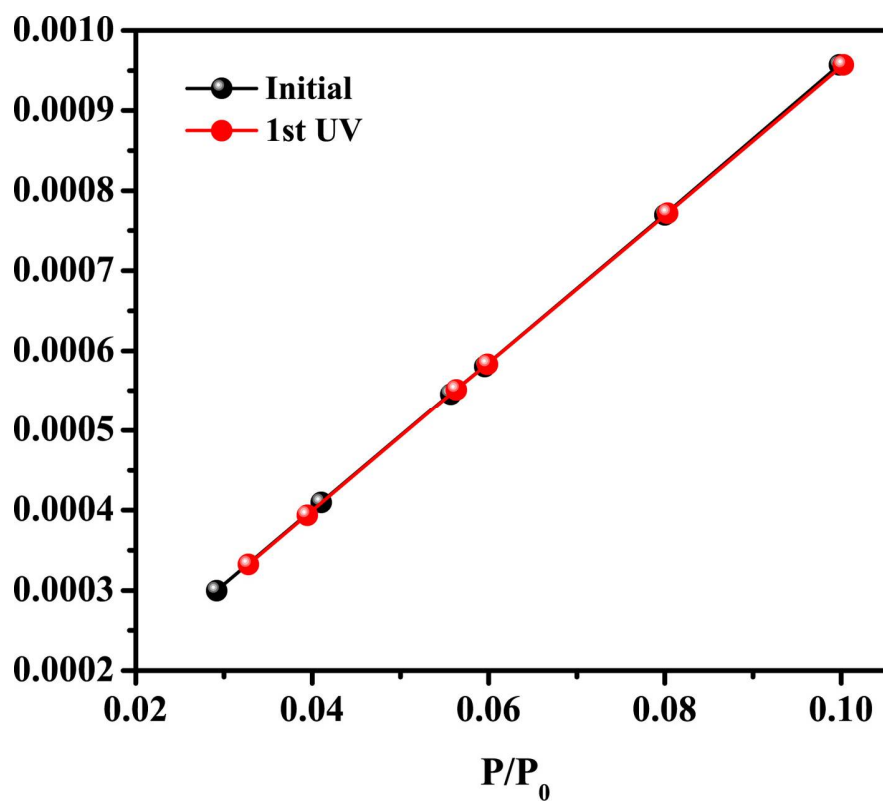

**Figure S2.** BET surface area plots.

**Table S1.** The BET surface area report of JJU-1.

| JJU-1   | BET<br>[m <sup>2</sup> g <sup>-1</sup> ] | Slope<br>[g cm <sup>-3</sup> ] | Y-intercept<br>[g cm <sup>-3</sup> ] | C          | Qm<br>[cm <sup>3</sup> g <sup>-1</sup> ] | Correlation<br>coefficient |
|---------|------------------------------------------|--------------------------------|--------------------------------------|------------|------------------------------------------|----------------------------|
| Initial | 467.09                                   | 0.009290                       | 0.000028                             | 327.398390 | 107.3127                                 | 0.9999919                  |
| 1st UV  | 468.68                                   | 0.009258                       | 0.000029                             | 318.840491 | 107.6778                                 | 0.9999978                  |

## Calculation of isosteric heat of adsorption

The CO<sub>2</sub> isosteric heat of adsorption of JJU-1 was calculated as a function of the adsorption isotherms at 273 K and 298 K. The data were modelled with a virial-type expression composed of parameters  $a_i$  and  $b_i$  (eq 1), and the heat of adsorption was calculated from the fitting parameters using eq 2, where  $P$  is the pressure,  $N$  is the amount adsorbed,  $T$  is the temperature,  $R$  is the universal gas constant, and  $m$  and  $n$  determine the number of terms required to adequately describe the isotherm.  $a_i$  and  $b_i$  are virial coefficients.

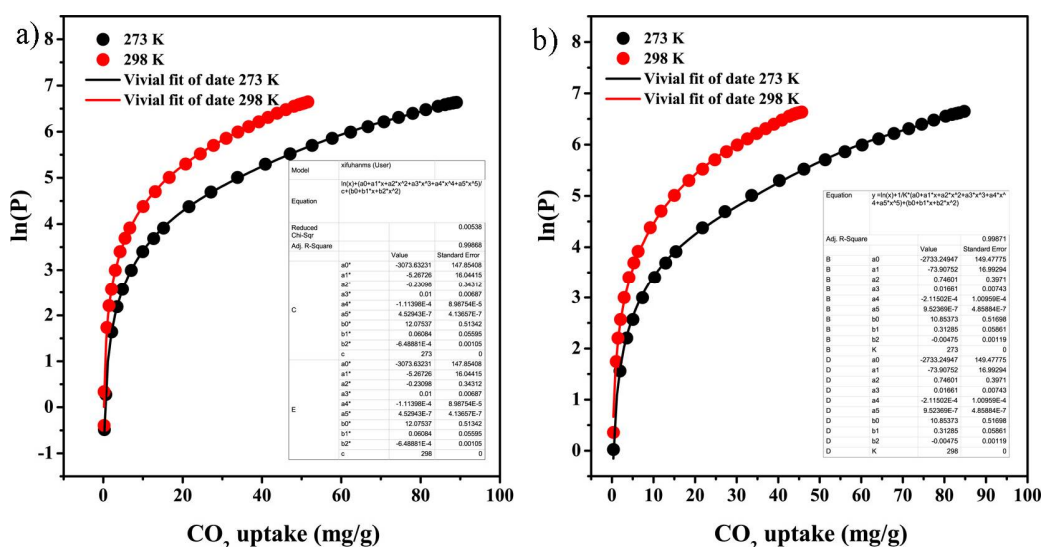

**Figure S3.** The plots of pressures in function of gas uptakes and the parameters (Virial-type expression) for the calculation of heats of adsorption of CO<sub>2</sub> for (a) initial JJU-1 and (b) JJU-1-1st UV.

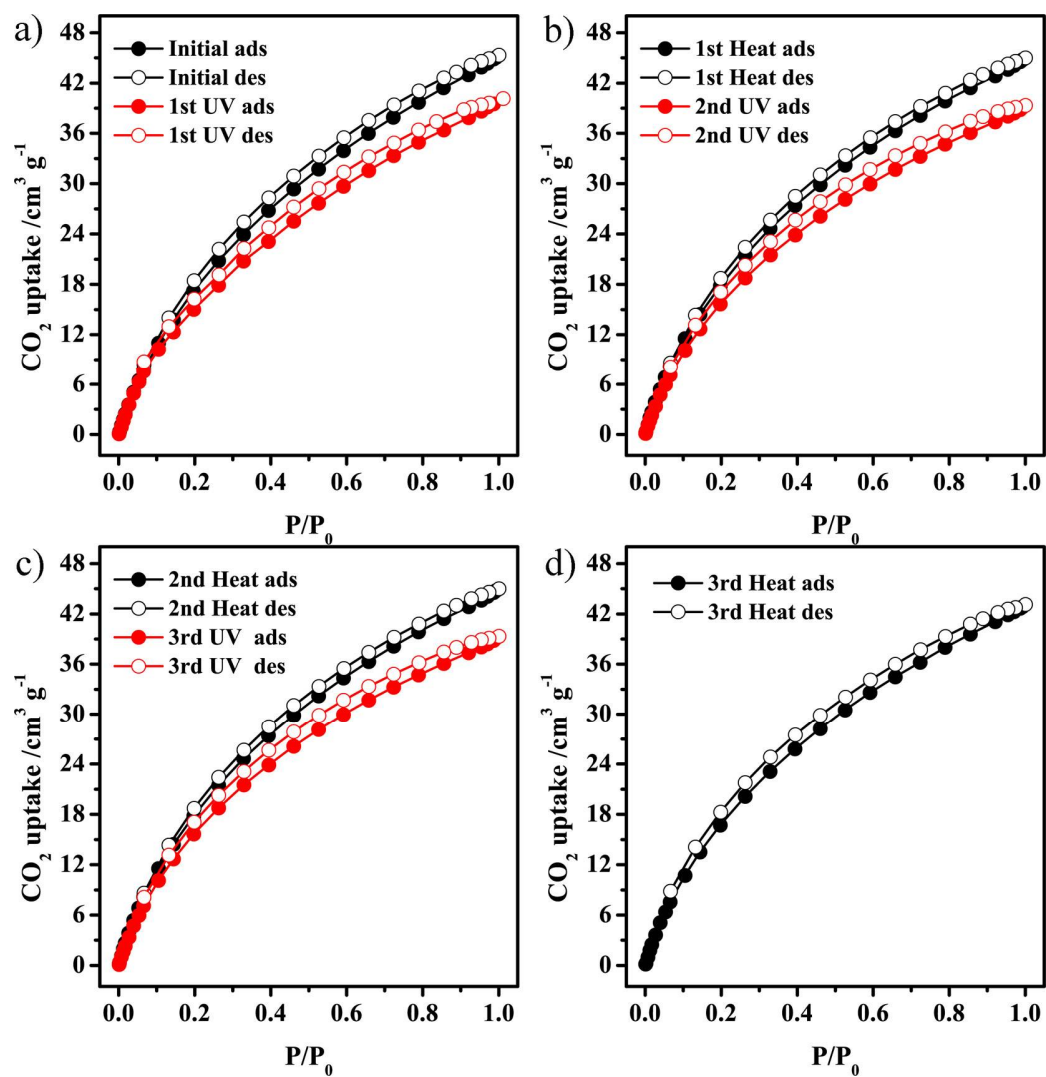

**Figure S4.** The reversible CO<sub>2</sub> adsorption isotherms at 273 K by UV irradiation and thermal treatment of JJU-1.

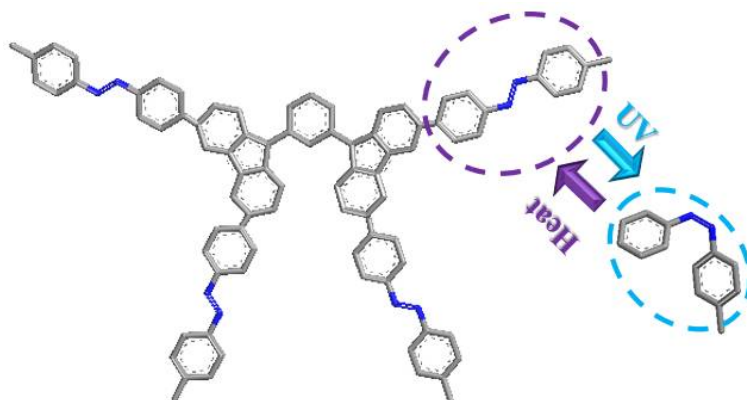

**Figure S5.** The schematic diagram of the structure changes during the reversible *trans/cis* transformation of azo functional group under UV irradiation and thermal regeneration.

**Table S2.** BET surface area reports and CO<sub>2</sub> uptakes of some similar POFs.

| <b>Materials</b>     | <b>BET [m<sup>2</sup>/g]</b> | <b>V<sub>total</sub> [cm<sup>3</sup>/g]</b> | <b>CO<sub>2</sub> uptake [cm<sup>3</sup>/g]</b> | <b>Q<sub>st</sub> [kJ/mol]</b> | <b>Reference</b> |
|----------------------|------------------------------|---------------------------------------------|-------------------------------------------------|--------------------------------|------------------|
| <b>Azo-MOP-1</b>     | 456                          | 0.48                                        | 49.6                                            | --                             | 1                |
| <b>PAF-36</b>        | 325                          | 0.25                                        | 28.6                                            | 27.0                           | 2                |
| <b>PAF-36-UV</b>     | 385                          | 0.27                                        | 31.2                                            | 28.4                           | 2                |
| <b>PAF-37</b>        | 443                          | 0.27                                        | 26.3                                            | 36.8                           | 2                |
| <b>PAF-37-UV</b>     | 456                          | 0.28                                        | 29.6                                            | 40.7                           | 2                |
| <b>TAP-1</b>         | 474                          | 0.74                                        | 48.4                                            | 35.6                           | 3                |
| <b>UCBZ-1</b>        | 980                          | 1.46                                        | 39.0                                            | --                             | 4                |
| <b>UCBZ-1-UV</b>     | --                           | --                                          | 50.0                                            | --                             | 4                |
| <b>azo-COP-1</b>     | 608                          | 0.39                                        | 54.7                                            | 29.3                           | 5                |
| <b>azo-COP-2</b>     | 703                          | 0.42                                        | 56.2                                            | 24.8                           | 5                |
| <b>Azo-POF-1</b>     | 712                          | --                                          | 66.7                                            | 27.5                           | 6                |
| <b>Azo-POF-2</b>     | 439                          | --                                          | 43.0                                            | 26.6                           | 6                |
| <b>ALP-4</b>         | 862                          | 0.50                                        | 41.2                                            | 28.2                           | 7                |
| <b>POF-Initial</b>   | 571                          | 0.49                                        | 46.2                                            | 26.7                           | 8                |
| <b>POF-1st UV</b>    | 549                          | 0.48                                        | 41.6                                            | 29.7                           | 8                |
| <b>JJU-1-Initial</b> | 467                          | 0.31                                        | 45.3                                            | 27.1                           | This work        |
| <b>JJU-1st UV</b>    | 469                          | 0.34                                        | 40.1                                            | 33.1                           | This work        |

## References

- [1] Yang, Z.; Zhang, H.; Yu, B.; Zhao, Y.; Ma, Z.; Ji, G.; Han, B.; Liu, Z. Azo-Functionalized Microporous Organic Polymers: Synthesis and Applications in CO<sub>2</sub> Capture and Conversion. *Chem. Commun.* **2015**, *51*, 11576–11579.
- [2] Yuan, R.; Ren, H.; He, H.; Jiang, L.; Zhu, G. Targeted Synthesis of Porous Aromatic Frameworks with Stimuli-Responsive Adsorption Properties. *Sci. China Mater.* **2015**, *58*, 38–43.
- [3] Bera, R.; Ansari, M.; Alam, A.; Das, N. Triptycene, Phenolic-OH, and Azo-Functionalized Porous Organic Polymers: Efficient and Selective CO<sub>2</sub> Capture. *ACS Appl. Polym. Mater.* **2019**, *1*, 959–968.
- [4] Zhu, Y.; Zhang, W. Reversible Tuning of Pore Size and CO<sub>2</sub> Adsorption in Azobenzene Functionalized Porous Organic Polymers. *Chem. Sci.* **2014**, *5*, 4957–4961.
- [5] Patel, H.A.; Je, S.H.; Park, J.; Chen, D.P.; Jung, Y.; Yavuz, C.T.; Coskun, A. Unprecedented High-Temperature CO<sub>2</sub> Selectivity in N<sub>2</sub>-Phobic Nanoporous Covalent Organic Polymers. *Nat. Commun.* **2013**, *4*, 1357.
- [6] Lu, J.; Zhang, J. Facile Synthesis of Azo-Linked Porous Organic Frameworks via Reductive Homocoupling for Selective CO<sub>2</sub> Capture. *J. Mater. Chem. A* **2014**, *2*, 13831–13834.
- [7] Arab, P.; Rabbani, M.G.; Sekizkardes, A.K.; Islamoglu, T.; El-Kaderi, H.M. Copper(I)-Catalyzed Synthesis of Nanoporous Azo-Linked Polymers: Impact of Textural Properties on Gas Storage and Selective Carbon Dioxide Capture. *Chem. Mater.* **2014**, *26*, 1385–1392.
- [8] Yuan, R.; Sun, H.; Yan, Z.; He, H. Rational Design and Synthesis of a Task-Specific Porous Organic Framework Featured Azobenzene as a Photoresponsive Low-Energy CO<sub>2</sub> Adsorbent. *J. Solid State Chem.* **2021**, *297*, 122049.
